# Supplementary material for: Aspergillus niger as an efficient biological agent for separator sludge remediation: two-level factorial design for optimal fermentation
Source: PeerJ. 2024 Jul 15;12:e17151. doi: 10.7717/peerj.17151 (PMC11257062; doi:10.7717/peerj.17151)
Supplement: File S1 — The design matrix and the responses of two-level factorial design. These data were used for statistical analysis and process optimization. [file peerj-12-17151-s001.xlsx]

## Sheet: Design matrix and responses
Run	Factor 1	Factor 2	Factor 3	Factor 4	Response 1	Response 2
	A: Temperature	B: Agitation speed	C: Fermentation duration	D: Sample concentration	COD	Turbidity
					removal	removal
	℃	RPM	Hours	%	%	%
1	40	200	72	100	91.55	96.45
2	20	200	72	100	95.29	95.18
3	20	200	72	20	87.62	98.64
4	40	200	72	20	89.43	97.97
5	20	100	72	100	95.3	98.47
6	20	100	72	20	49.61	99.33
7	20	200	240	20	93.05	93.67
8	40	100	240	100	95.32	96.31
9	40	200	240	100	94.33	97.61
10	20	200	240	100	47.84	99.46
11	40	100	240	20	77.61	95.77
12	40	100	72	100	95.45	97.3
13	20	100	240	20	94.96	99.51
14	40	200	240	20	98.52	99.57
15	20	100	240	100	95.03	97.3
16	40	100	72	20	96.75	99.48
17	40	200	72	100	91.29	96.05
18	20	200	72	100	94.66	96.41
19	20	200	72	20	86.75	98.55
20	40	200	72	20	87.95	97.93
21	20	100	72	100	95.32	98.51
22	20	100	72	20	49.66	99.46
23	20	200	240	20	93.35	96.58
24	40	100	240	100	95.33	96.65
25	40	200	240	100	94.34	97.65
26	20	200	240	100	51.46	99.52
27	40	100	240	20	76.21	95.91
28	40	100	72	100	95.22	96.65
29	20	100	240	20	94.96	99.51
30	40	200	240	20	97.15	99.53
31	20	100	240	100	95.07	97.45
32	40	100	72	20	97.59	99.46
