# Supplementary material for: Aspergillus niger as an efficient biological agent for separator sludge remediation: two-level factorial design for optimal fermentation
Source: PeerJ. 2024 Jul 15;12:e17151. doi: 10.7717/peerj.17151 (PMC11257062; doi:10.7717/peerj.17151)
Supplement: File S2 [file peerj-12-17151-s002.xlsx]

## Sheet: ANOVA
Source	Sum of Squares	df	Mean Square	F-value	p-value
Model- COD removal	7253.03	15	483.54	729.65	< 0.0001	significant
A-Temperature	742.18	1	742.18	1119.95	< 0.0001
B-Agitation speed	0.723	1	0.723	1.09	0.3118
C-Fermentation duration	0.7534	1	0.7534	1.14	0.3021
D-Concentration	83.3	1	83.3	125.7	< 0.0001
AB	38.22	1	38.22	57.67	< 0.0001
AC	24.38	1	24.38	36.79	< 0.0001
AD	4.21	1	4.21	6.36	0.0227
BC	338.59	1	338.59	510.92	< 0.0001
BD	1222.03	1	1222.03	1844.03	< 0.0001
CD	859.15	1	859.15	1296.45	< 0.0001
ABC	1702.51	1	1702.51	2569.06	< 0.0001
ABD	514.8	1	514.8	776.83	< 0.0001
ACD	1538.6	1	1538.6	2321.72	< 0.0001
BCD	129.89	1	129.89	196	< 0.0001
ABCD	53.69	1	53.69	81.02	< 0.0001
Model- Turbidity removal	70.62	15	4.71	14.01	< 0.0001	significant
A-Temperature	1.65	1	1.65	4.9	0.0417
B-Agitation speed	1.24	1	1.24	3.69	0.0727
C-Fermentation duration	0.4608	1	0.4608	1.37	0.2588
D-Concentration	6.04	1	6.04	17.96	0.0006
AB	8.78	1	8.78	26.11	0.0001
AC	0.0171	1	0.0171	0.0509	0.8243
AD	2	1	2	5.95	0.0267
BC	8.67	1	8.67	25.8	0.0001
BD	1.01	1	1.01	3	0.1025
CD	9.79	1	9.79	29.13	< 0.0001
ABC	4.32	1	4.32	12.86	0.0025
ABD	5.07	1	5.07	15.09	0.0013
ACD	1.14	1	1.14	3.39	0.0841
BCD	3.18	1	3.18	9.45	0.0073
ABCD	17.26	1	17.26	51.34	< 0.0001
